# Supplementary material for: Distinct cellular and molecular mechanisms for β3 adrenergic receptor-induced beige adipocyte formation
Source: eLife journal article supplement (doi:10.7554/elife.30329), 2017-10-11
Supplement: supp [file elife-30329-supp-v1.zip]

Archive with 20 entries (20 files):
- elife_poa_e30329_Figure_6_figure_supplement_1.pdf
- elife_poa_e30329_Transparent_Reporting_File.docx
- elife_poa_e30329_Figure_2_figure_supplement_4.pdf
- elife_poa_e30329_Figure_2_figure_supplement_3.pdf
- elife_poa_e30329_Figure_7_figure_supplement_2.pdf
- elife_poa_e30329_Figure_2_figure_supplement_5.pdf
- elife_poa_e30329_Figure_2_figure_supplement_2.pdf
- elife_poa_e30329_Figure_1_figure_supplement_1.pdf
- elife_poa_e30329_Figure_2_figure_supplement_7.pdf
- elife_poa_e30329_Figure_3_figure_supplement_2.pdf
- elife_poa_e30329_Figure_5_figure_supplement_2.pdf
- elife_poa_e30329_Figure_2_figure_supplement_8.pdf
- elife_poa_e30329_Figure_5_figure_supplement_1.pdf
- elife_poa_e30329_Figure_3_figure_supplement_3.pdf
- elife_poa_e30329_Figure_3_figure_supplement_1.pdf
- elife_poa_e30329_Figure_7_figure_supplement_1.pdf
- elife_poa_e30329_Figure_2_figure_supplement_6.pdf
- elife_poa_e30329_Figure_2_figure_supplement_1.pdf
- elife_poa_e30329_Supplementary_file_1.docx
- elife_poa_e30329_Figure_4_figure_supplement_1.pdf
