# Supplementary material for: Distinct cellular and molecular mechanisms for β3 adrenergic receptor-induced beige adipocyte formation
Source: eLife journal article supplement (doi:10.7554/elife.30329), 2017-10-11

Figure 7—figure supplement 1

**A** SV white adipogenesis

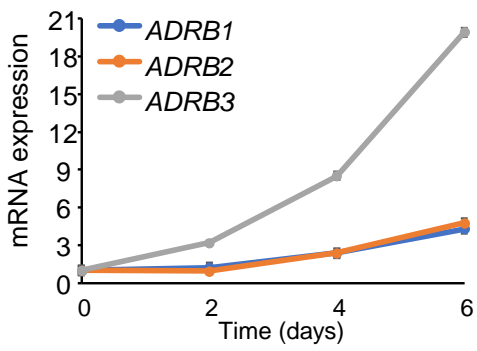

**B** *Acta2*<sup>Cre-ERT2</sup>; RFP

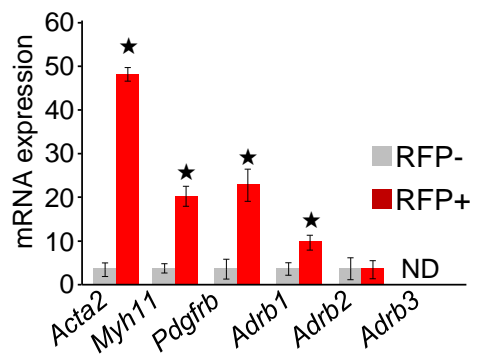

**C** *Pdgfra*<sup>Cre-ERT2</sup>; RFP

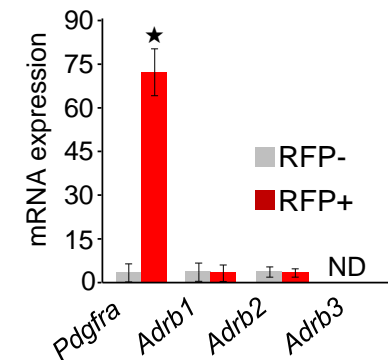

Supplement: supp [file elife-30329-supp-v1.zip]
