# Supplementary figures and images for: Distinct cellular and molecular mechanisms for β3 adrenergic receptor-induced beige adipocyte formation
Source: eLife journal article supplement (doi:10.7554/elife.30329), 2017-10-11

Figure 3—figure supplement 3

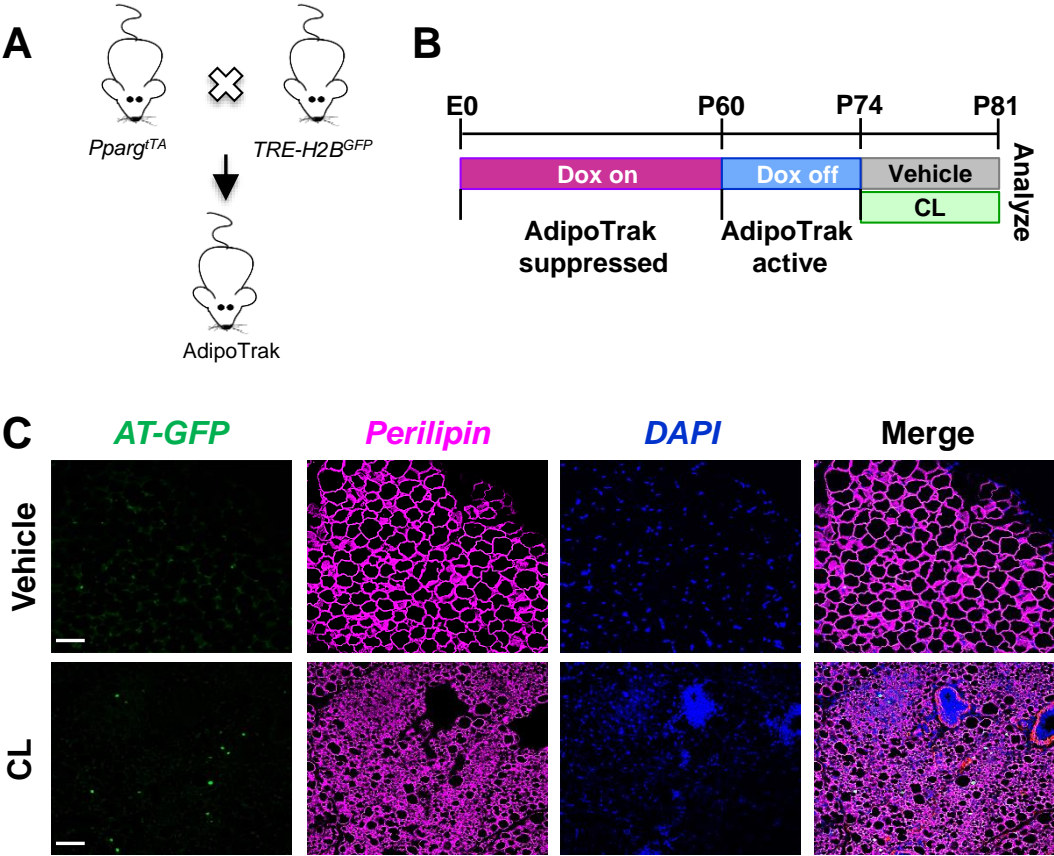

Supplement: supp [file elife-30329-supp-v1.zip]

Figure 3—figure supplement 2

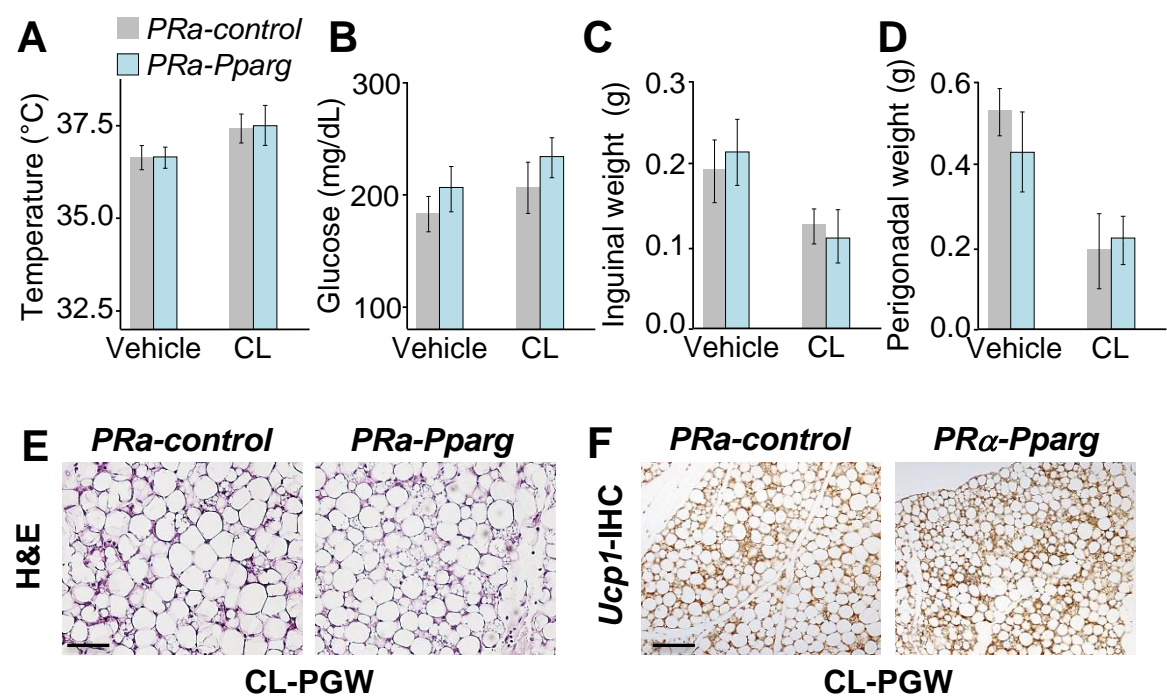

Supplement: supp [file elife-30329-supp-v1.zip]

Figure 2—figure supplement 3

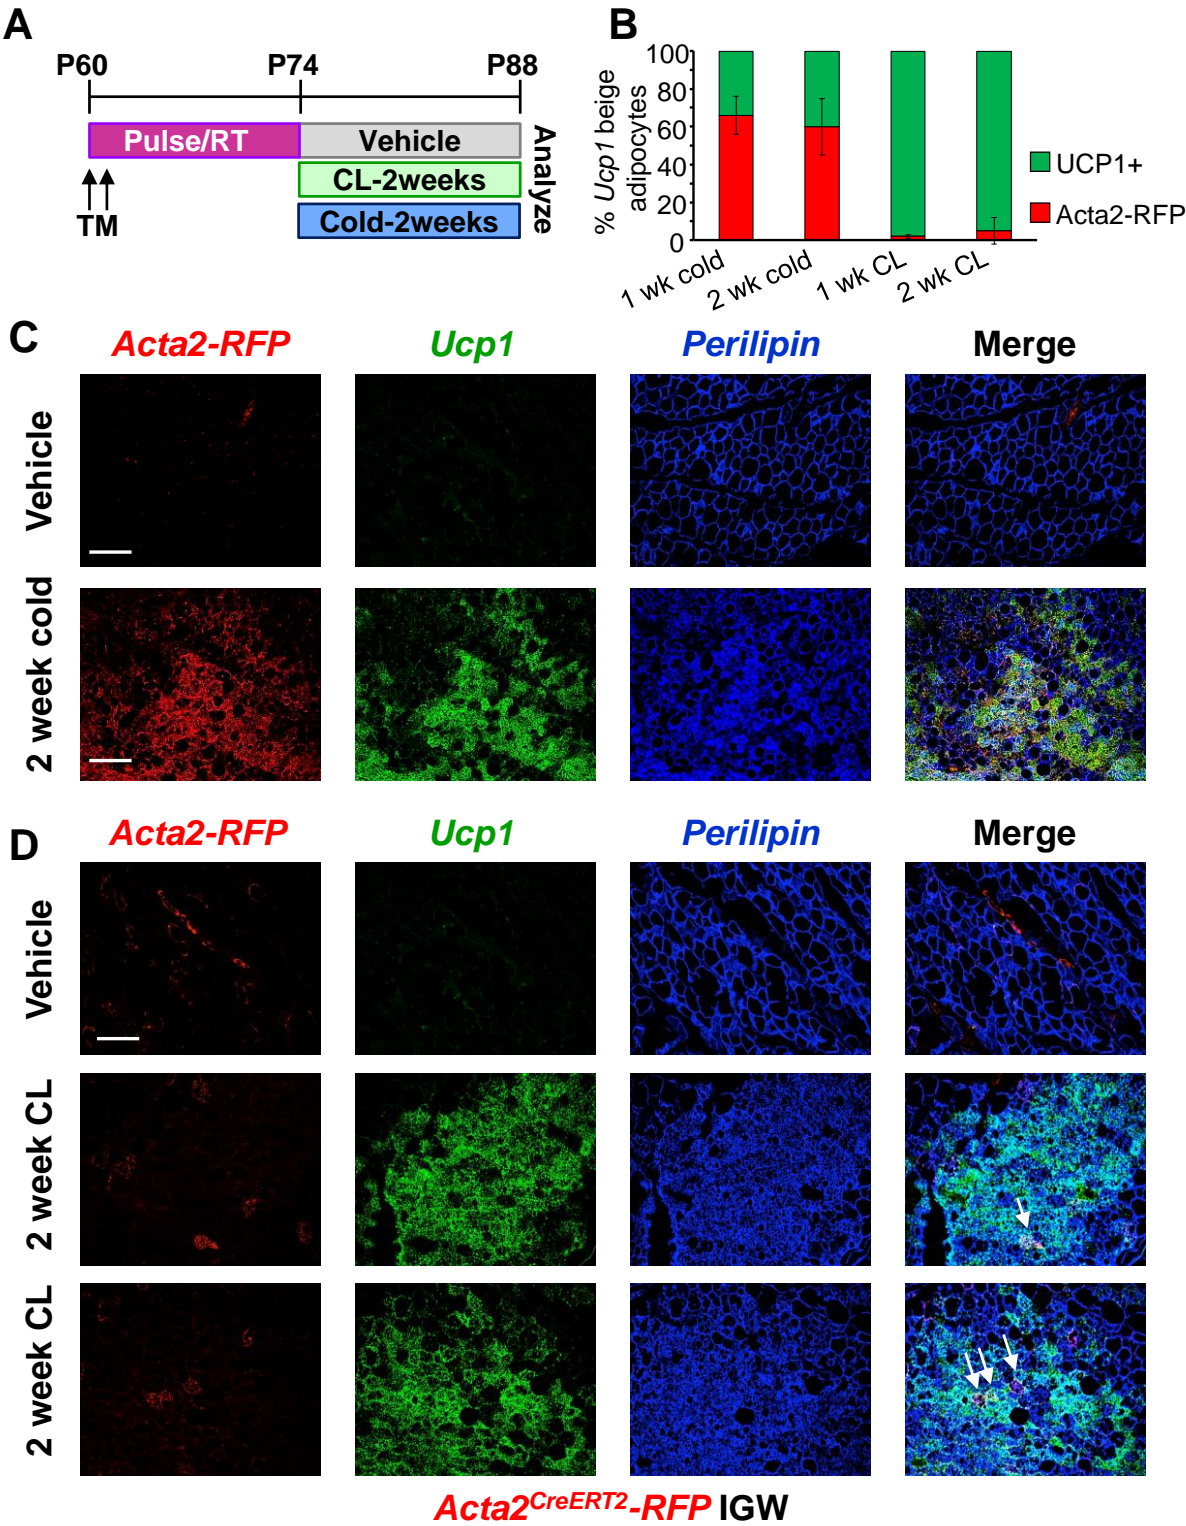

Supplement: supp [file elife-30329-supp-v1.zip]

Figure 2—figure supplement 5

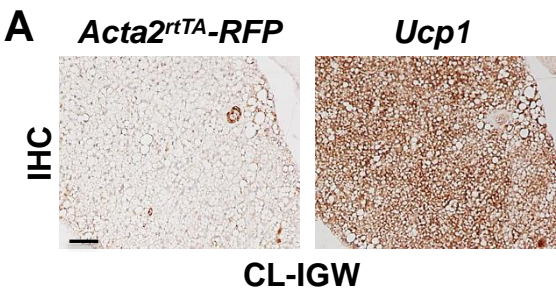

Supplement: supp [file elife-30329-supp-v1.zip]

Figure 2—figure supplement 8

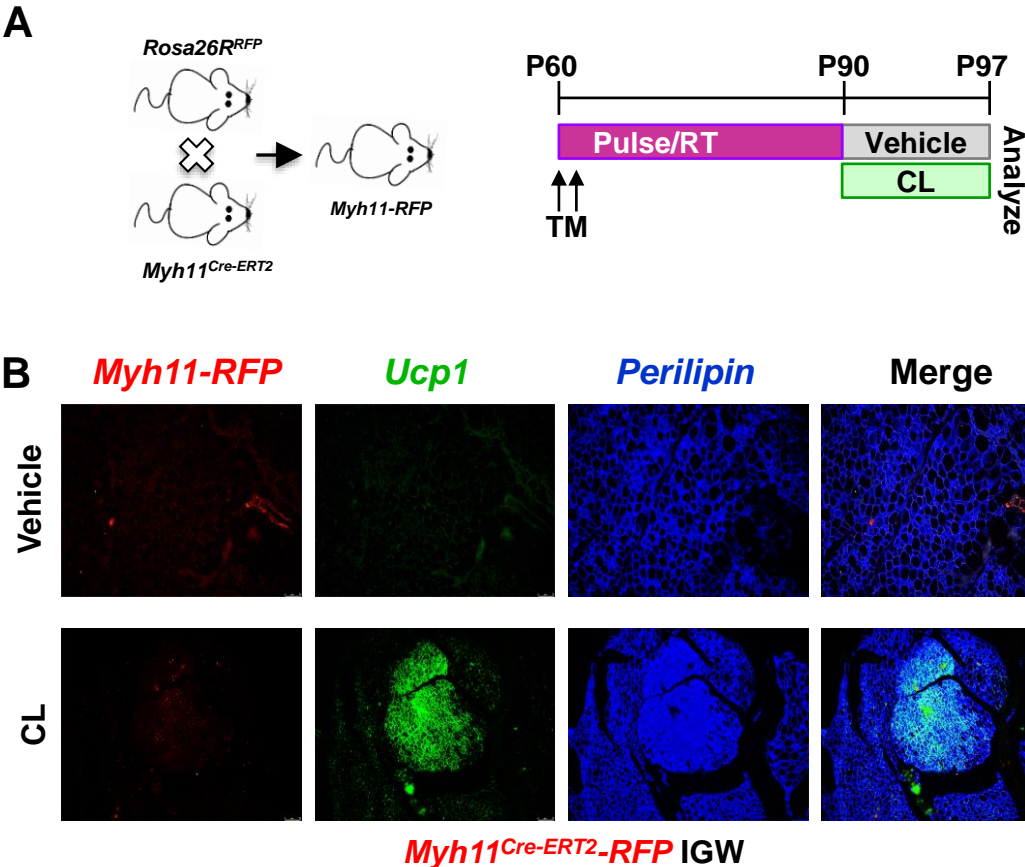

Supplement: supp [file elife-30329-supp-v1.zip]

Figure 1—figure supplement 1

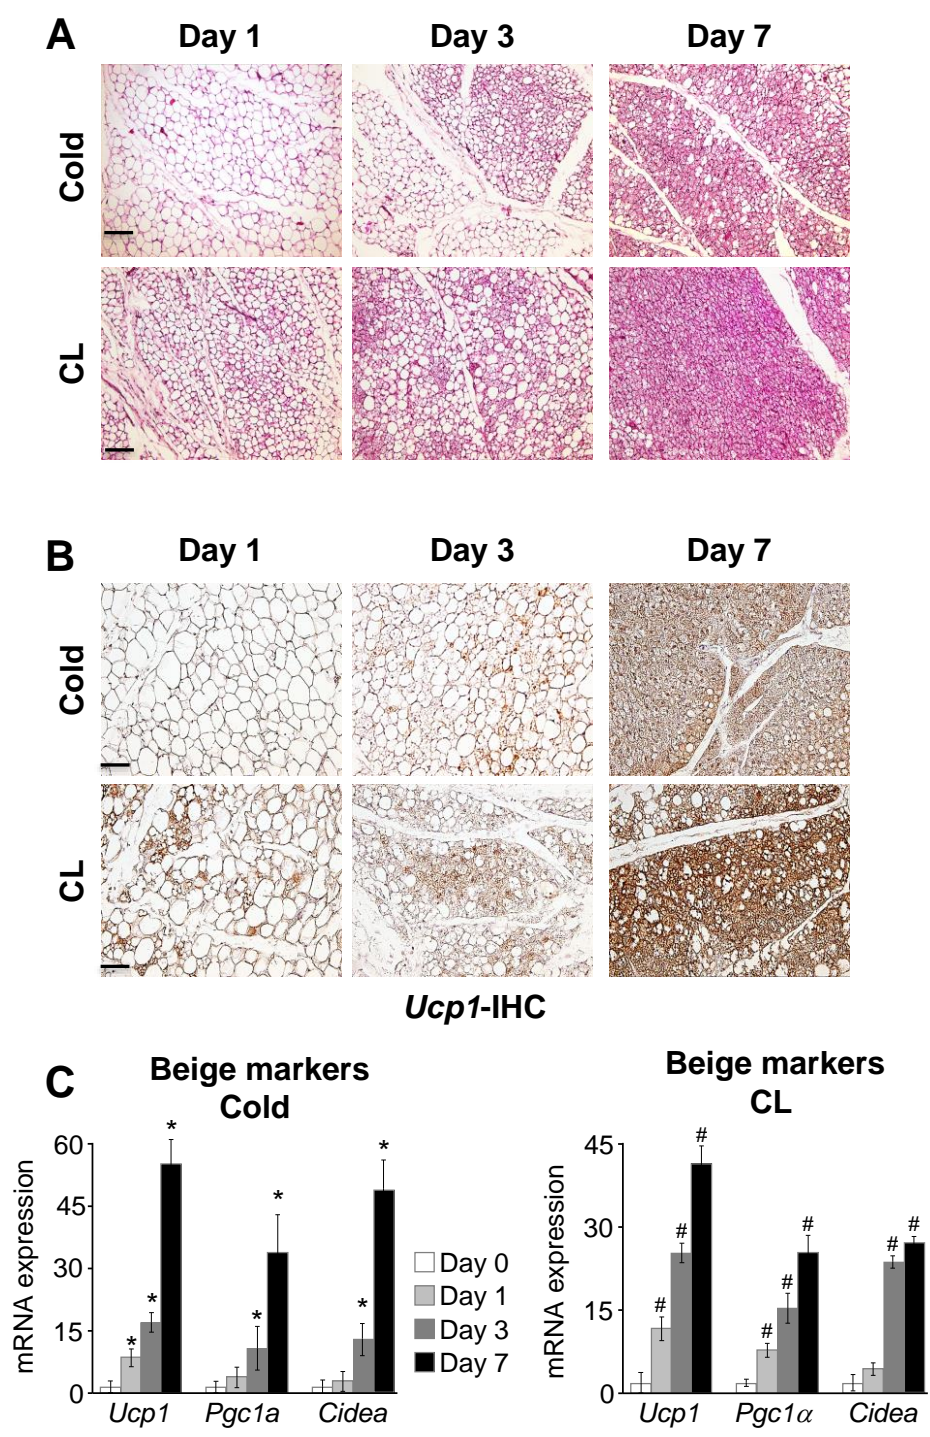

Supplement: supp [file elife-30329-supp-v1.zip]

Figure 2—figure supplement 2

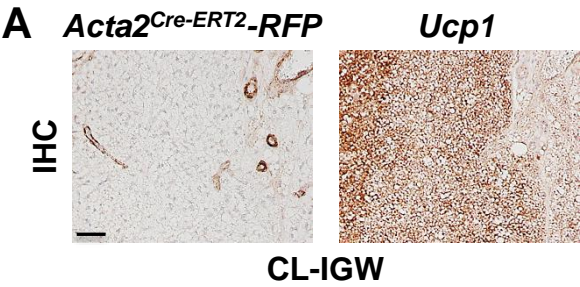

Supplement: supp [file elife-30329-supp-v1.zip]

Figure 6—figure supplement 1

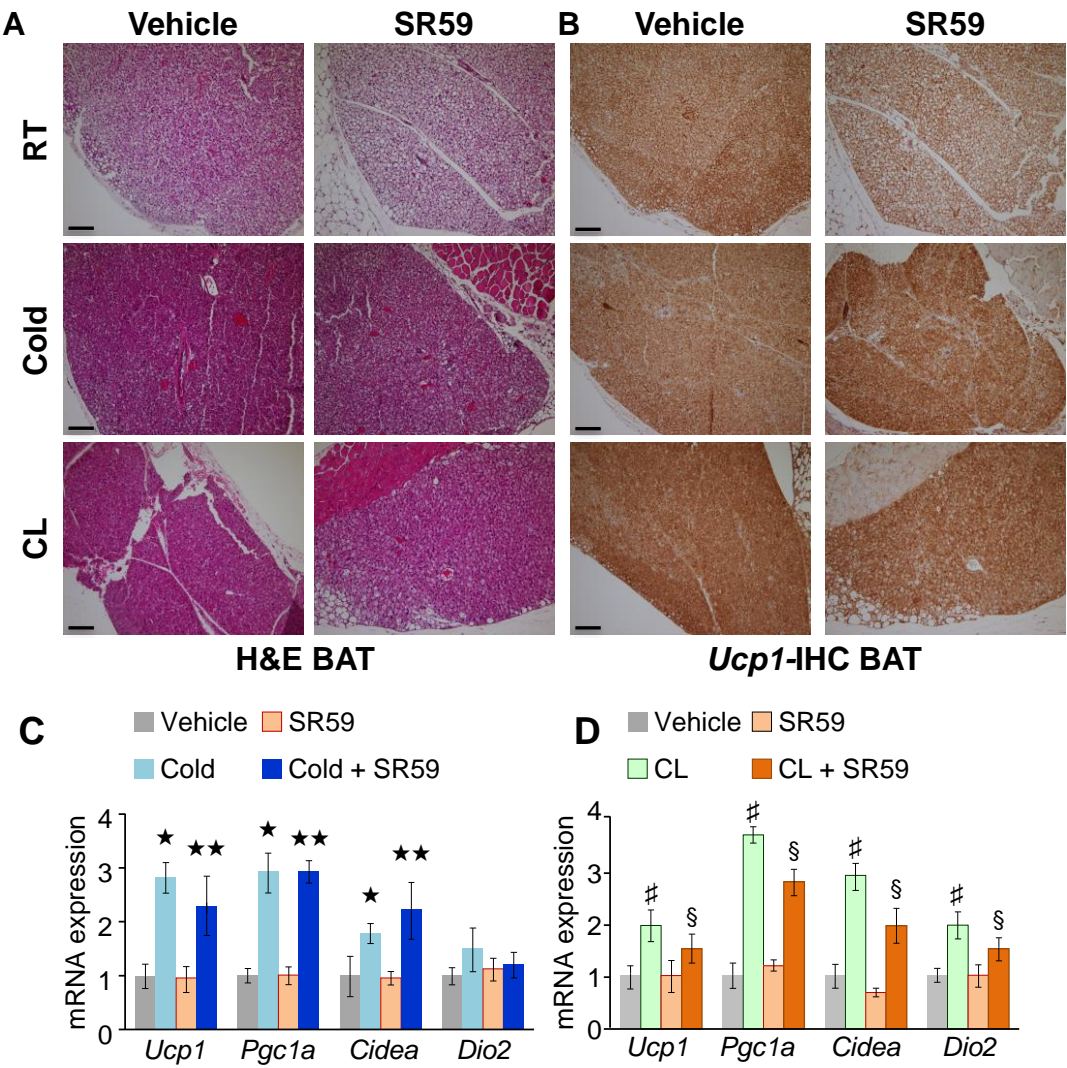

Supplement: supp [file elife-30329-supp-v1.zip]

Figure 5—figure supplement 1

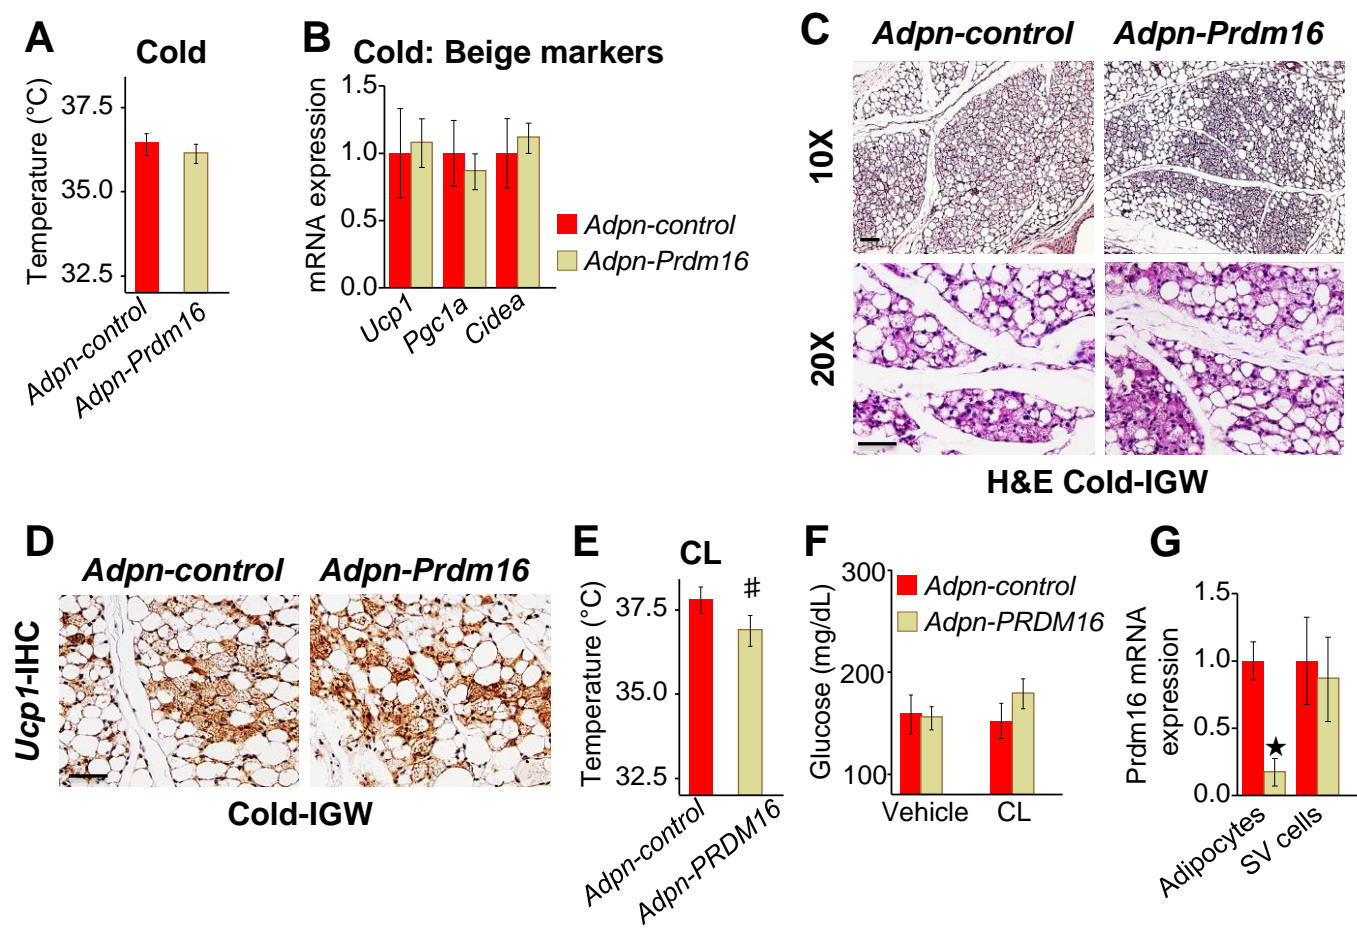

Supplement: supp [file elife-30329-supp-v1.zip]

Figure 5—figure supplement 2

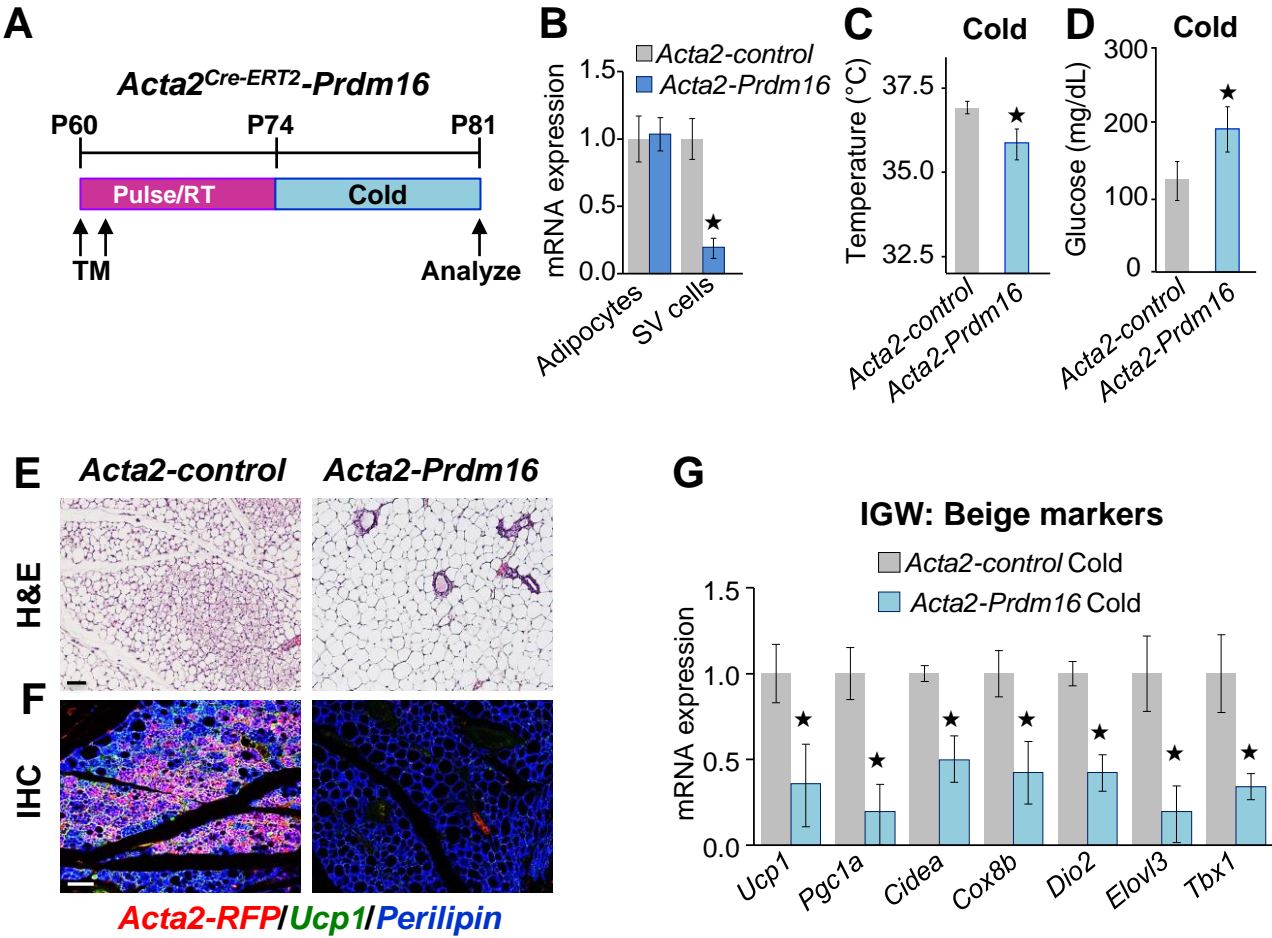

Supplement: supp [file elife-30329-supp-v1.zip]

Figure 2—figure supplement 4

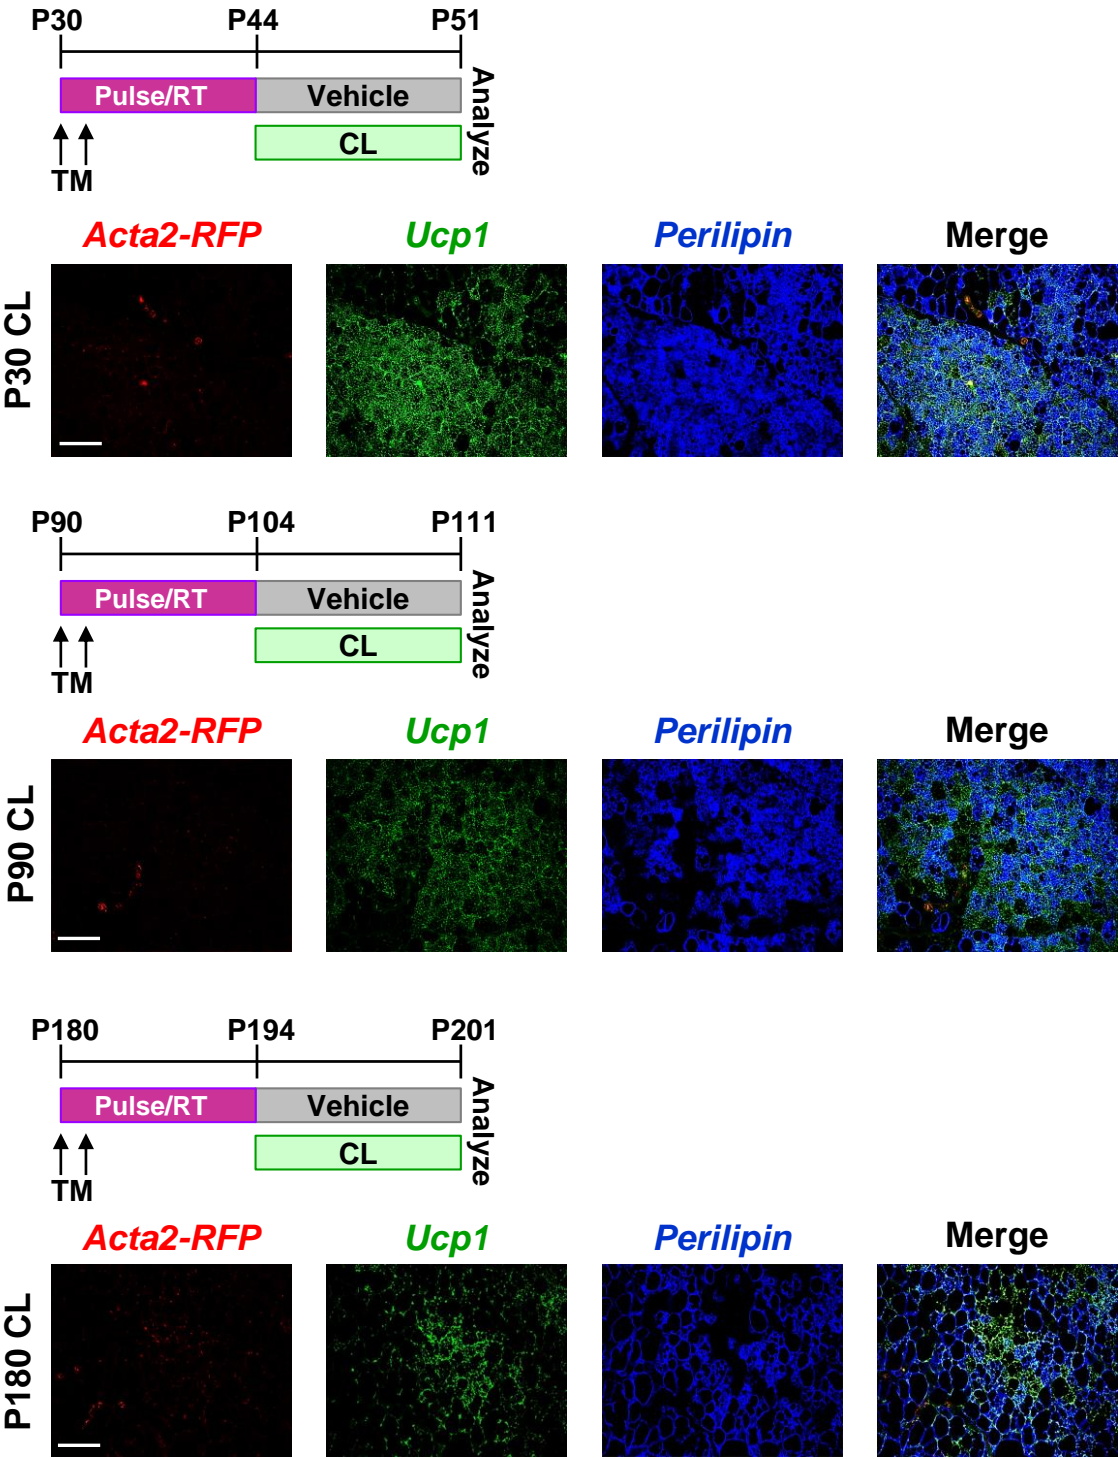

Supplement: supp [file elife-30329-supp-v1.zip]

Figure 7—figure supplement 2

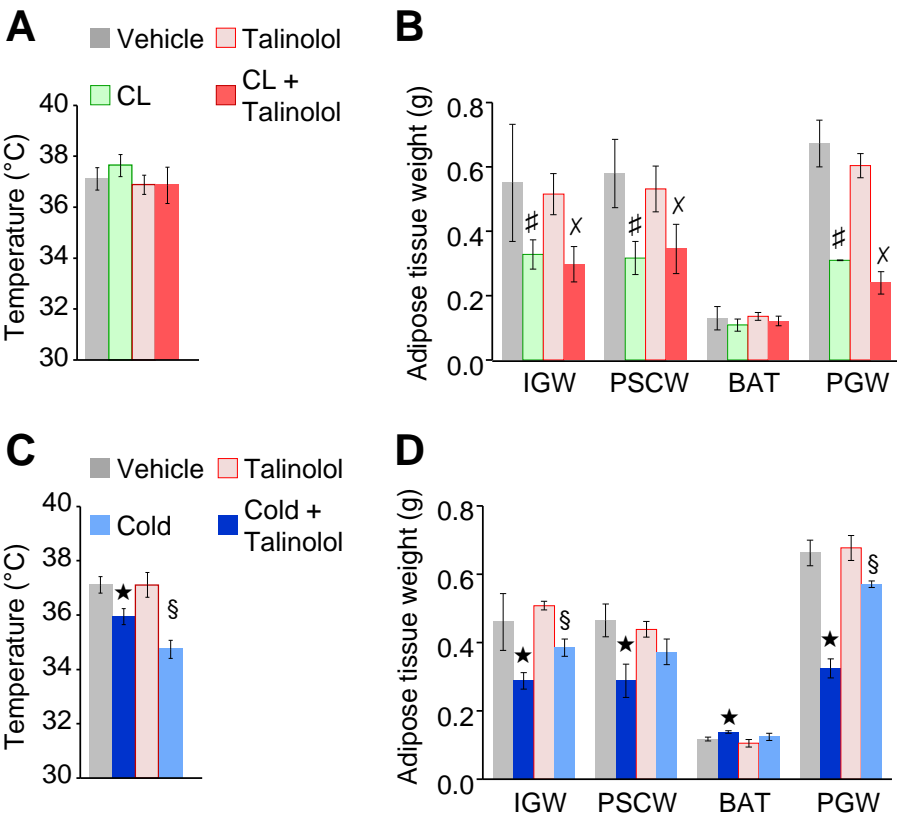

Supplement: supp [file elife-30329-supp-v1.zip › elife_poa_e30329_Figure_7_figure_supplement_2.pdf]

Figure 2—figure supplement 7

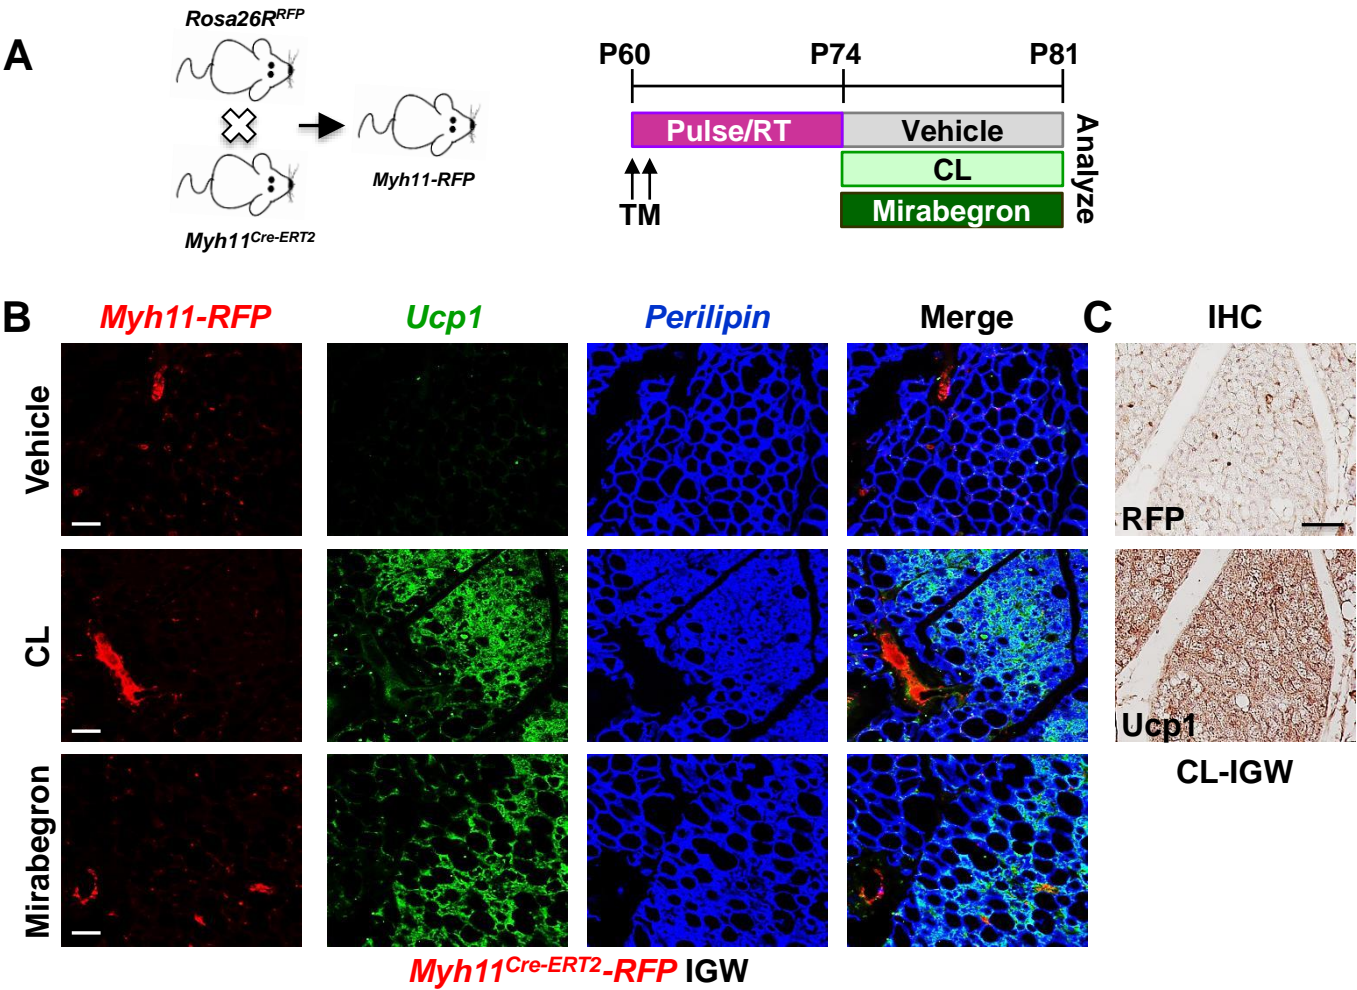

Supplement: supp [file elife-30329-supp-v1.zip › elife_poa_e30329_Figure_2_figure_supplement_7.pdf]

Figure 3—figure supplement 1

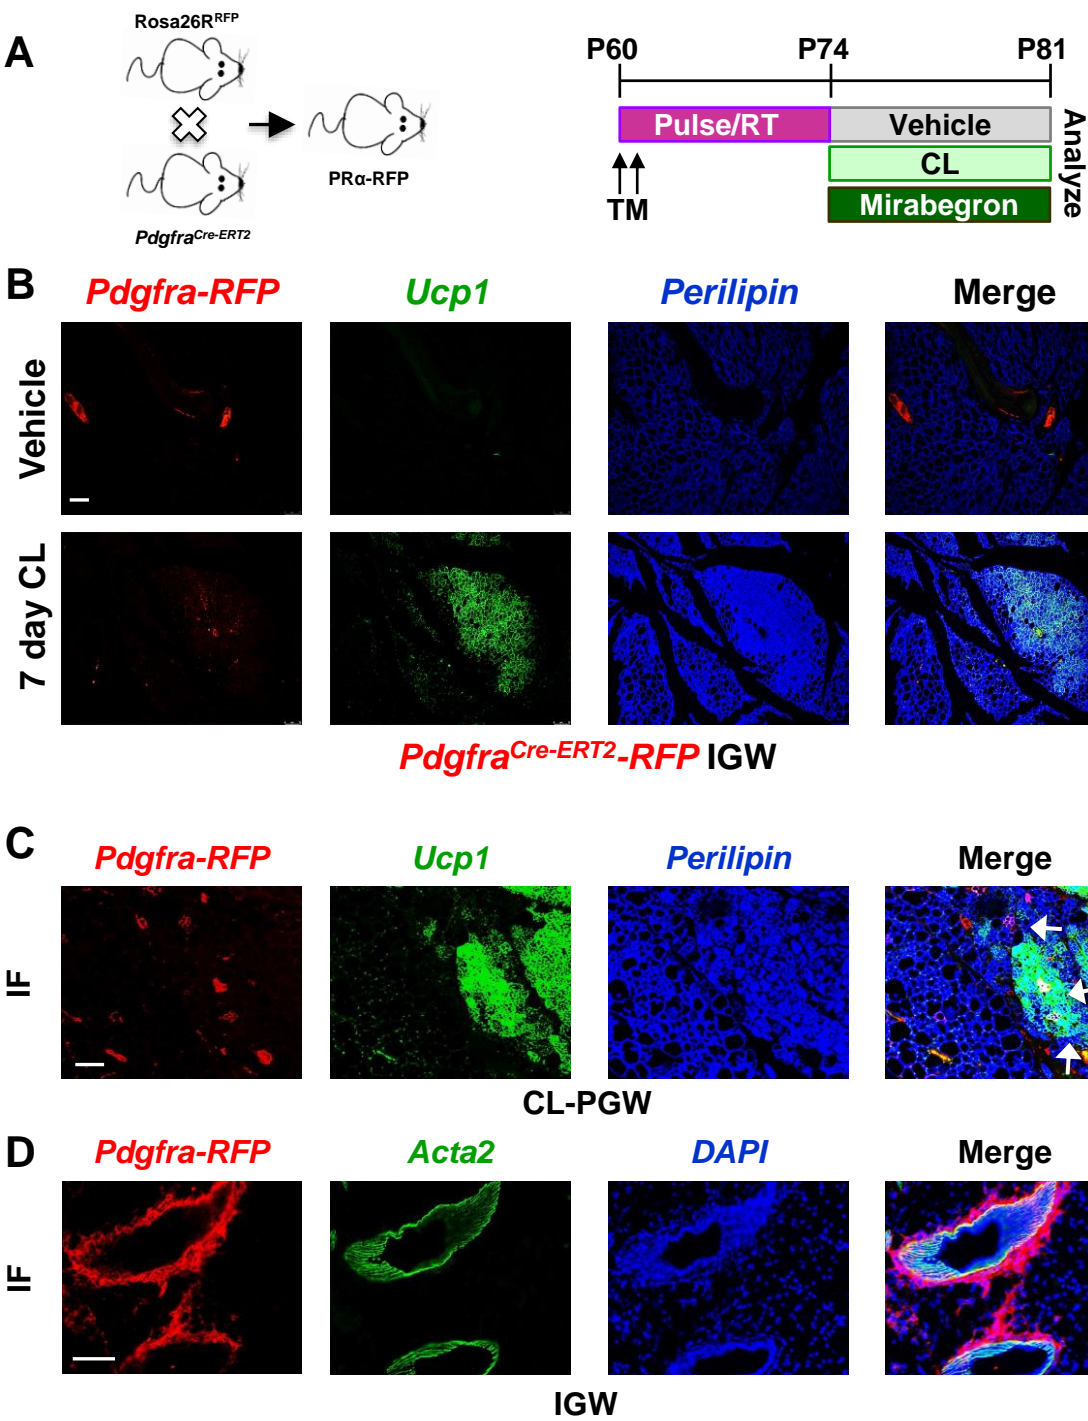

Supplement: supp [file elife-30329-supp-v1.zip › elife_poa_e30329_Figure_3_figure_supplement_1.pdf]

Figure 7—figure supplement 1

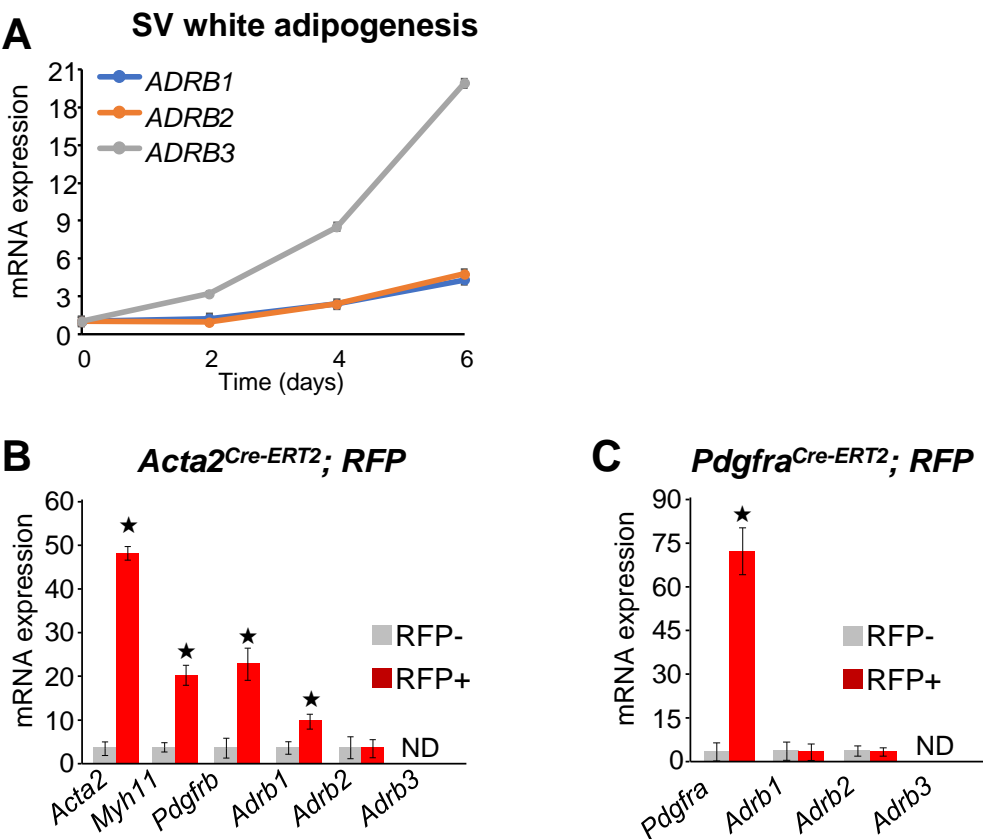

Supplement: supp [file elife-30329-supp-v1.zip › elife_poa_e30329_Figure_7_figure_supplement_1.pdf]

Figure 2—figure supplement 6

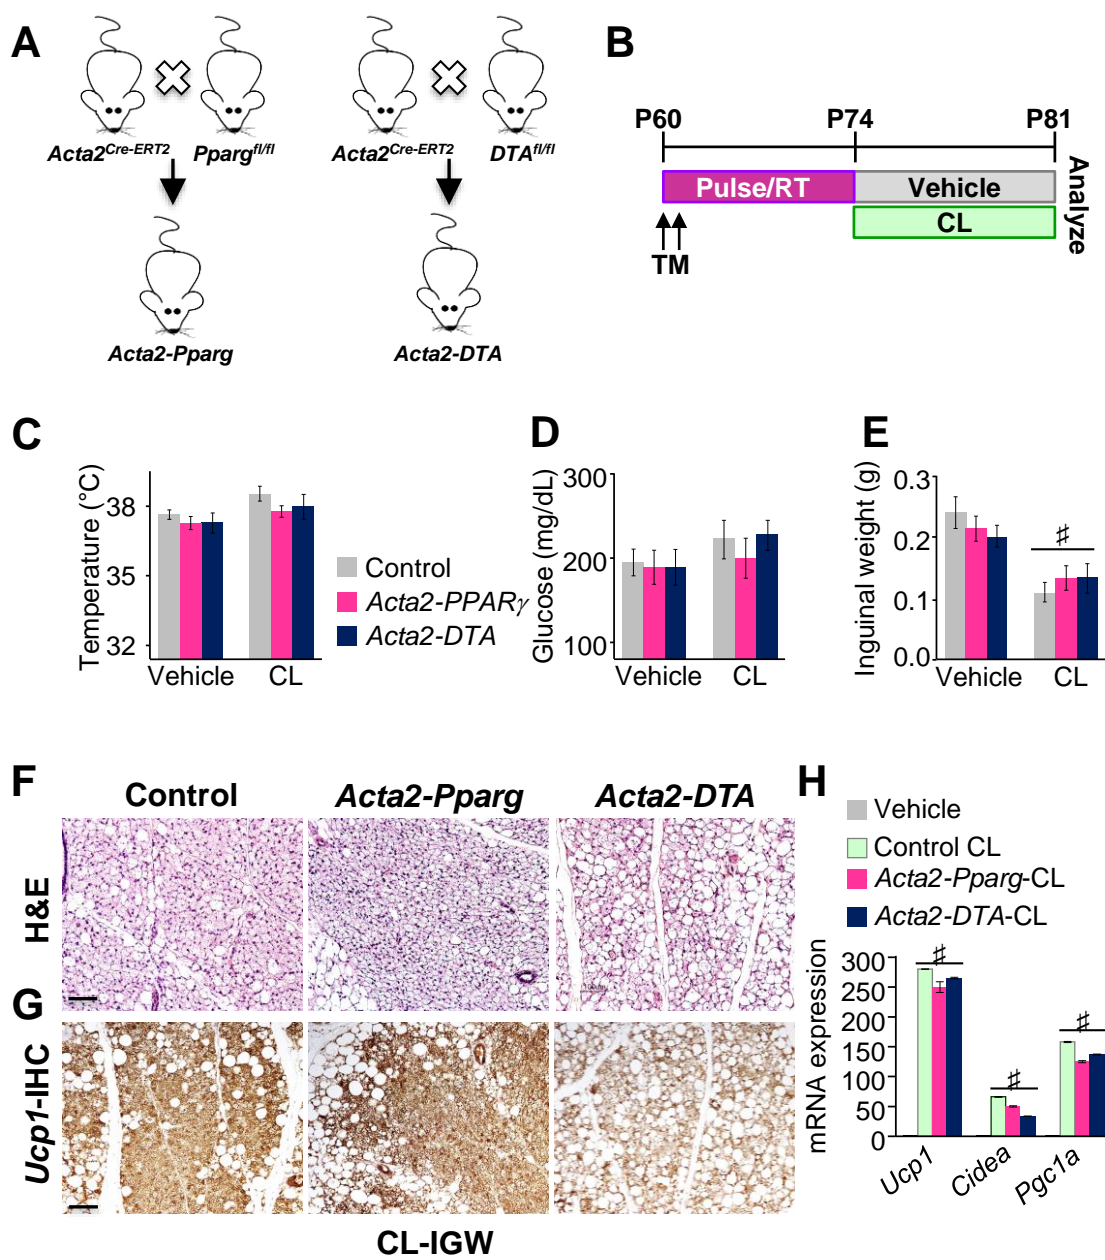

Supplement: supp [file elife-30329-supp-v1.zip › elife_poa_e30329_Figure_2_figure_supplement_6.pdf]

Figure 2—figure supplement 1

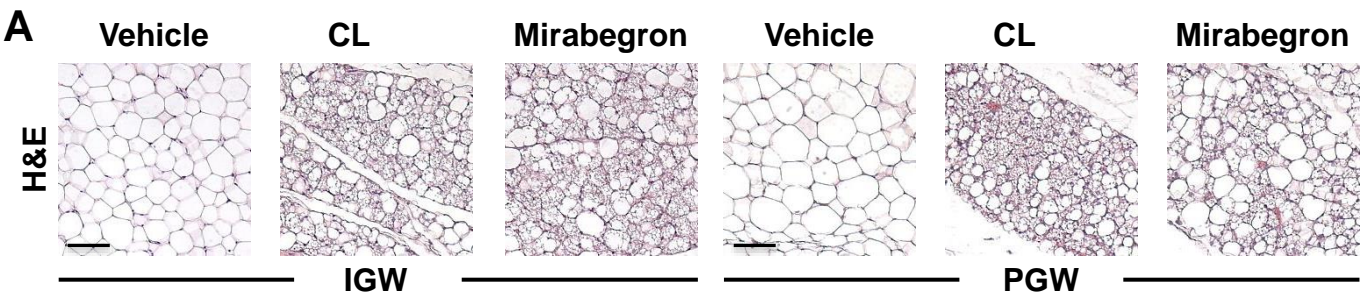

Supplement: supp [file elife-30329-supp-v1.zip › elife_poa_e30329_Figure_2_figure_supplement_1.pdf]

Figure 4—figure supplement 1

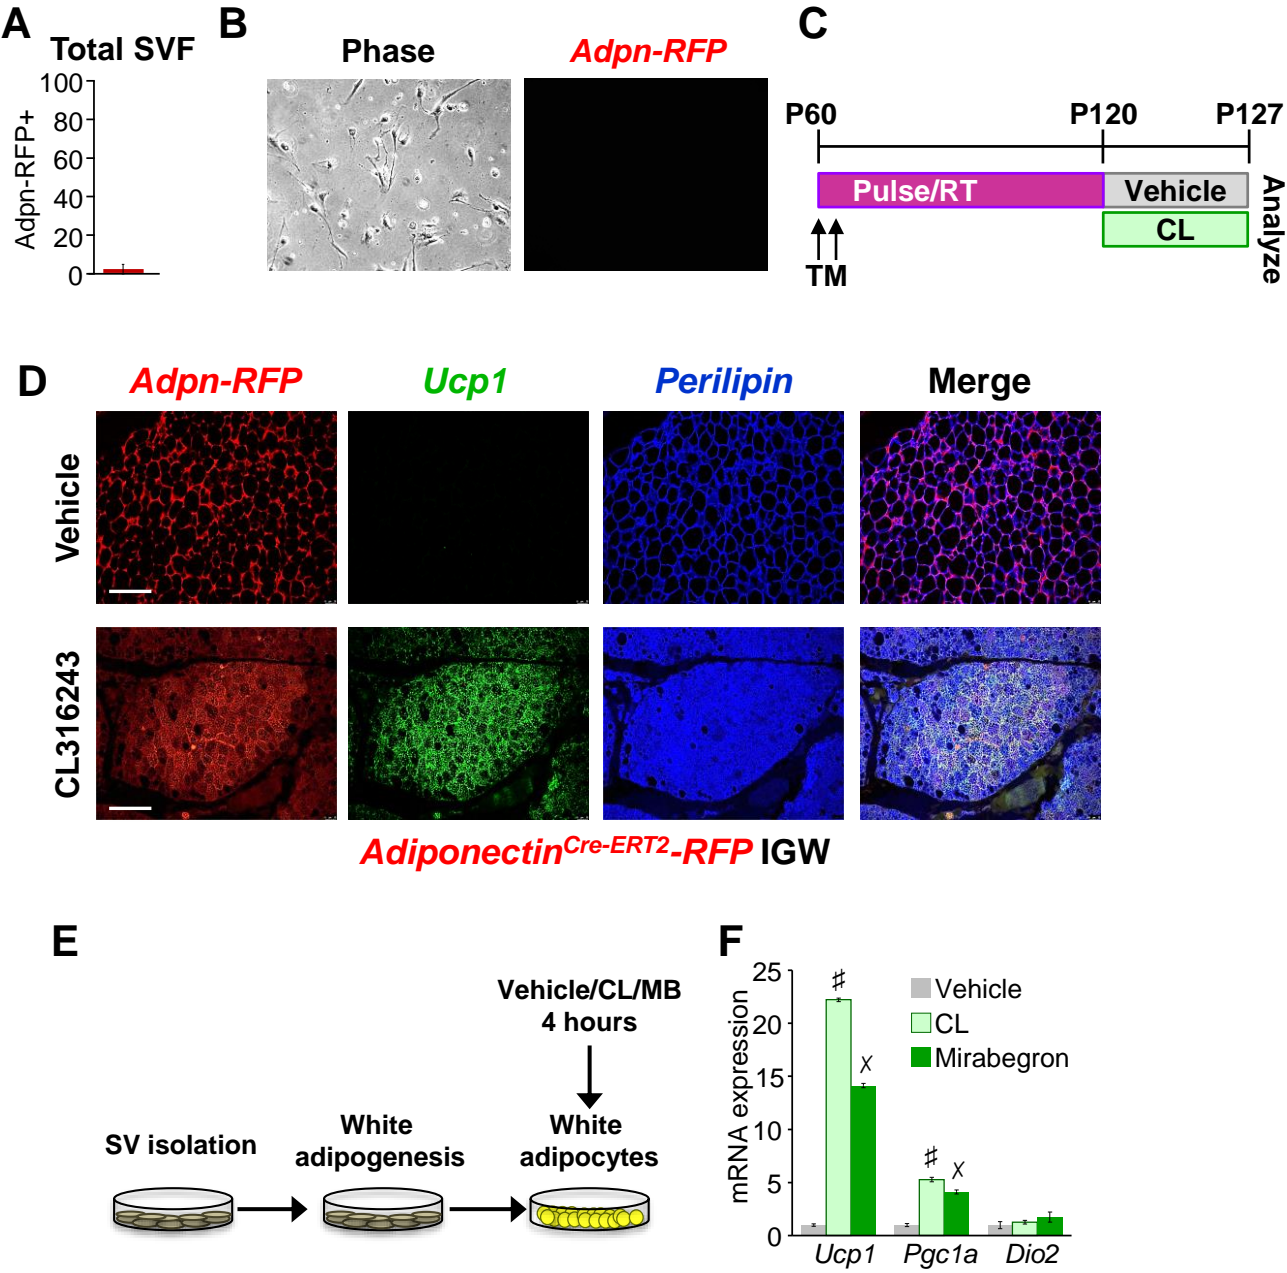

Supplement: supp [file elife-30329-supp-v1.zip › elife_poa_e30329_Figure_4_figure_supplement_1.pdf]
